# Supplementary material for: Deep transformer-based personalized dosimetry from SPECT/CT images: a hybrid approach for [177Lu]Lu-DOTATATE radiopharmaceutical therapy
Source: Springer Nature journal article supplement (doi:10.1007/s00259-024-06618-9), 2024-01-25
Supplement: MOESM1 [file 26661728]

**Supplementary Table 1.** The administered activities are calculated in a personalized way and mentioned only for cycle one. Mean absorbed doses are calculated using Monte Carlo (Gy) for the corresponding first cycle. Not all tumors are mentioned. The volumes (ml) of tumors are reported in parentheses. The tumors are located in the liver or other soft-tissues except \* which are on bony structures and \*\* which is in lung tissue. The dose information is not provided for those whose scan FOV does not cover the bladder. Patients N-026 and N-028 had only one tumor.

| Patient code        | Sex | Age(y) | Height (m) | Weight (Kg) | Number of therapy cycles | Admin. Activity (Mbq) | Left kidney | Right kidney | Healthy liver | Spleen | Bone marrow | Bladder      | Lungs       | Spinal cord | Tumor 1         | Tumor 2         |
|---------------------|-----|--------|------------|-------------|--------------------------|-----------------------|-------------|--------------|---------------|--------|-------------|--------------|-------------|-------------|-----------------|-----------------|
| N-026<br>(20161108) | F   | 26     | 1.64       | 122.18      | 4                        | 1017                  | 1.645       | 3.187        | 0.49          | 2.69   | 0.026       | –            | 0.00032     | 0.035       | 2.2<br>(7)      | -               |
| N-014<br>(20160712) | F   | 40     | 1.7        | 61.82       | 4                        | 9213                  | 0.837       | 0.904        | 0.33          | 0.95   | 0.136       | 0.377        | 0.001       | 0.286       | 0.7<br>(52.6)   | 1.07<br>(30.9)  |
| N-027<br>(20161213) | F   | 55     | 1.6        | 81.8        | 2                        | 6105                  | 0.803       | 1.22         | 1.586         | 0.761  | 0.086       | 0.0036       | 0.0001      | 0.105       | 7<br>(16.7)     | 9.16<br>(354)   |
| R-011<br>(20160607) | M   | 57     | 1.8        | 90.9        | 1                        | 1206                  | 1.1         | 0.921        | 3.01          | 0.975  | 0.921       | –            | 0.0002      | 0.004       | 6.7<br>(60)     | 10<br>(947)     |
| N-015<br>(20160712) | M   | 58     | 1.64       | 68.64       | 4                        | 1102                  | 1.618       | 0.792        | 2.37          | 0.9464 | 0.011       | –            | 0.147       | 0.064       | 1.26<br>(60)    | 4.75<br>(17.6)  |
| N-018<br>(20160816) | M   | 58     | 1.65       | 77.73       | 3                        | 9324                  | 1.99        | 2.05         | 1.71          | 3.37   | 0.029       | –            | <b>8.84</b> | 0.005       | 10.65<br>(15.3) | 8.19<br>(81.6)  |
| N-010<br>(20160607) | M   | 60     | 1.8        | 80.45       | 4                        | 9250                  | 2.27        | 2.424        | 0.47          | 1.0404 | 0.098       | –            | 0.118       | 0.14        | 2.5<br>(48)     | 0.34<br>(64.6)  |
| N-029<br>(20170131) | M   | 62     | 1.7        | 93.5        | 1                        | 5846                  | 0.7         | 0.77         | 1.127         | 4.32   | 0.0197      | 0.0521       | 0.0007      | 0.001       | 20<br>(83.6)    | 11.3<br>(18.9)  |
| N-020<br>(20160823) | M   | 62     | 1.67       | 61.36       | 1                        | 8658                  | 0.928       | 1.07         | <b>5.57</b>   | 1.006  | 0.1217      | –            | 0.1366      | 0.1217      | 15.92<br>(7.4)  | 10.3<br>(200.7) |
| R-009<br>(20160607) | M   | 64     | 1.71       | 120.9       | 2                        | 1043                  | 1.902       | 1.404        | 0.96          | 2.71   | 0.013       | –            | 0.0001      | 0.0031      | 9<br>(384)      | 11<br>(60)      |
| N-033<br>(20170221) | F   | 68     | 1.69       | 63.6        | 1                        | 7992                  | 1.997       | 1.896        | 1.03          | 2.265  | 0.201       | 0.60         | 0.025       | 0.237       | 7.7*<br>(9.1)   | 12.8<br>(43.5)  |
| R-021<br>(2010823)  | M   | 71     | 1.65       | 88.07       | 2                        | 9657                  | 2.18        | 2.335        | 0.431         | 1.996  | 0.08        | –            | 0.049       | 0.08        | 2.7<br>(33.6)   | 0.56<br>(3.8)   |
| N-025<br>(20161108) | M   | 74     | 1.7        | 74.9        | 2                        | 7215                  | 2.03        | 1.74         | 2.04          | 1.856  | 0.11        | <b>2.117</b> | 0.02        | 0.189       | 3.1**<br>(56.8) | 0.68<br>(3.5)   |
| N-030<br>(20170214) | F   | 75     | 1.56       | 63.2        | 1                        | 7881                  | 2.207       | 2.66         | 0.65          | 2.25   | 0.084       | 0.437        | 0.007       | 0.162       | 7.4<br>(29.3)   | 6.95<br>(27.3)  |
| N-019<br>(20160823) | M   | 78     | 1.83       | 75.9        | 2                        | 5698                  | 0.728       | 0.688        | 0.353         | 0.842  | 0.0379      | –            | 0.0028      | 0.089       | 0.25*<br>(4.6)  | 1.2*<br>(3.3)   |
| N-023<br>(20160927) | M   | Na     | 1.69       | 85.9        | 4                        | 9612.53               | 1.618       | 1.5708       | 2.37          | 0.9464 | 0.069       | –            | 0.147       | 0.064       | 14.9<br>(92)    | 12<br>(120)     |
| N-028<br>(20170117) | F   | Na     | 1.62       | 72.3        | 3                        | 9401.65               | 2.275       | 2.6          | 0.574         | 1.4    | 0.004       | –            | 0.015       | 0.098       | 12.6<br>(100.7) | -               |
| N-038<br>(20170718) | F   | Na     | 1.5        | 76.8        | 3                        | 8258                  | 1.85        | 1.635        | 0.358         | 0.856  | 0.117       | 0.512        | 0.001       | 0.242       | 5.2*<br>(48)    | 1.13*<br>(6)    |
| N-044<br>(20170613) | M   | Na     | 1.78       | 79.9        | 4                        | 4900.2                | 0.30        | 0.398        | 0.17          | 0.374  | 0.0038      | –            | 0.0006      | 0.00051     | 1.44<br>(120)   | 0.8<br>(37)     |
| N-045<br>(20170613) | F   | Na     | 1.65       | 68.6        | 4                        | 4664.17               | 0.732       | 0.916        | 0.274         | 0.527  | 0.0247      | –            | 0           | 0.018       | 1.06<br>(44)    | 11.3<br>(107)   |
| N-046<br>(20170613) | M   | Na     | 1.84       | 71.2        | 3                        | 10261                 | 0.86        | 1.087        | 0.277         | 0.556  | 0.555       | –            | 0.089       | 0.079       | 14.3<br>(265)   | 8.85<br>(76)    |

**Supplementary Table 2.** The voxel level quantitative metrics for SSV, MSV and DL approaches in each fold. The reported values represent the mean  $\pm$  SD.

|                         | Fold 1               |                     |                     | Fold 2              |                     |                     | Fold 3              |                     |                     | Fold 4              |                     |                      | Fold 5              |                     |                     |
|-------------------------|----------------------|---------------------|---------------------|---------------------|---------------------|---------------------|---------------------|---------------------|---------------------|---------------------|---------------------|----------------------|---------------------|---------------------|---------------------|
|                         | SSV                  | MSV                 | DL                  | SSV                 | MSV                 | DL                  | SSV                 | MSV                 | DL                  | SSV                 | MSV                 | DL                   | SSV                 | MSV                 | DL                  |
| SSIM (%)                | 99.78 $\pm$ 0.0012   | 99.83 $\pm$ 0.0011  | 99.97 $\pm$ 0.0002  | 99.70 $\pm$ 0.0029  | 99.75 $\pm$ 0.0026  | 99.97 $\pm$ 0.0004  | 99.73 $\pm$ 0.0021  | 99.80 $\pm$ 0.0018  | 99.97 $\pm$ 0.0004  | 99.61 $\pm$ 0.0031  | 99.70 $\pm$ 0.0026  | 99.94 $\pm$ 0.0007   | 99.73 $\pm$ 0.0029  | 99.81 $\pm$ 0.0024  | 99.95 $\pm$ 0.0007  |
| PSNR                    | 54.3502 $\pm$ 4.5518 | 55.02 $\pm$ 4.80    | 61.82 $\pm$ 4.84    | 54.90 $\pm$ 4.34    | 55.49 $\pm$ 4.38    | 65.41 $\pm$ 3.95    | 54.50 $\pm$ 4.81    | 55.26 $\pm$ 4.8     | 62.76 $\pm$ 6.13    | 52.36 $\pm$ 7.37    | 53.03 $\pm$ 7.6     | 61.97 $\pm$ 6.82     | 55.95 $\pm$ 6.7     | 56.85 $\pm$ 7.05    | 61.47 $\pm$ 6.84    |
| RMSE (Gy <sup>2</sup> ) | 0.03 $\pm$ 0.01      | 0.02 $\pm$ 0.01     | 0.01 $\pm$ 0.01     | 0.04 $\pm$ 0.03     | 0.04 $\pm$ 0.03     | 0.01 $\pm$ 0.0075   | 0.03 $\pm$ 0.02     | 0.03 $\pm$ 0.02     | 0.01 $\pm$ 0.01     | 0.03 $\pm$ 0.01     | 0.03 $\pm$ 0.01     | 0.01 $\pm$ 0.0053    | 0.03 $\pm$ 0.02     | 0.02 $\pm$ 0.02     | 0.01 $\pm$ 0.01     |
| ME (Gy)                 | 0.0013 $\pm$ 0.0011  | 0.0007 $\pm$ 0.0005 | 0.0001 $\pm$ 0.0001 | 0.0021 $\pm$ 0.0018 | 0.0015 $\pm$ 0.0016 | 0.0002 $\pm$ 0.0001 | 0.0018 $\pm$ 0.0013 | 0.0011 $\pm$ 0.0010 | 0.0000 $\pm$ 0.0003 | 0.0014 $\pm$ 0.0008 | 0.0008 $\pm$ 0.0006 | -0.0001 $\pm$ 0.0002 | 0.0014 $\pm$ 0.0009 | 0.0006 $\pm$ 0.0006 | 0.0002 $\pm$ 0.0002 |
| MAE (Gy)                | 0.0022 $\pm$ 0.0016  | 0.0016 $\pm$ 0.0010 | 0.0009 $\pm$ 0.0006 | 0.0032 $\pm$ 0.0022 | 0.0026 $\pm$ 0.0020 | 0.0010 $\pm$ 0.0005 | 0.0029 $\pm$ 0.0019 | 0.0022 $\pm$ 0.0014 | 0.0011 $\pm$ 0.0009 | 0.0024 $\pm$ 0.0012 | 0.0018 $\pm$ 0.0008 | 0.0009 $\pm$ 0.0005  | 0.0025 $\pm$ 0.0012 | 0.0018 $\pm$ 0.0008 | 0.0012 $\pm$ 0.0005 |
| MSE (Gy <sup>2</sup> )  | 0.0012 $\pm$ 0.0014  | 0.0010 $\pm$ 0.0012 | 0.0003 $\pm$ 0.0006 | 0.0033 $\pm$ 0.0043 | 0.0030 $\pm$ 0.0039 | 0.0002 $\pm$ 0.0002 | 0.0019 $\pm$ 0.0017 | 0.0016 $\pm$ 0.0015 | 0.0004 $\pm$ 0.0005 | 0.0014 $\pm$ 0.0015 | 0.0013 $\pm$ 0.0014 | 0.0001 $\pm$ 0.0001  | 0.0016 $\pm$ 0.0034 | 0.0014 $\pm$ 0.0031 | 0.0007 $\pm$ 0.0014 |
| RE (%)                  | 1.22 $\pm$ 1.70      | -1.23 $\pm$ 0.56    | 0.32 $\pm$ 0.55     | 1.01 $\pm$ 2.28     | -1.63 $\pm$ 0.66    | 0.57 $\pm$ 0.60     | 1.43 $\pm$ 2.24     | -0.9 $\pm$ 0.9      | -1.48 $\pm$ 0.9     | 0.72 $\pm$ 2.37     | -2 $\pm$ 1.41       | -1.81 $\pm$ 1.4      | 1.27 $\pm$ 2.42     | -1.7 $\pm$ 1.23     | 0.13 $\pm$ 1.21     |
| RAE (%)                 | 7.05 $\pm$ 3.61      | 5.09 $\pm$ 1.73     | 4.67 $\pm$ 1.65     | 8.31 $\pm$ 3.34     | 5.84 $\pm$ 1.37     | 5.19 $\pm$ 1.28     | 7.60 $\pm$ 3.11     | 5.21 $\pm$ 1.30     | 5.40 $\pm$ 1.27     | 7.72 $\pm$ 3.3      | 5.7 $\pm$ 1.67      | 5.64 $\pm$ 1.56      | 8.21 $\pm$ 2.12     | 5.8 $\pm$ 0.9       | 5.44 $\pm$ 0.78     |
| Gamma pass rate (%)     | 98.86 $\pm$ 0.94     | 98.87 $\pm$ 1.01    | 99.19 $\pm$ 0.66    | 99.19 $\pm$ 1.25    | 99.22 $\pm$ 1.24    | 99.5 $\pm$ 0.67     | 98.38 $\pm$ 2.15    | 98.98 $\pm$ 1.5     | 98.93 $\pm$ 1.51    | 98.22 $\pm$ 1.68    | 98.3 $\pm$ 1.50     | 98.30 $\pm$ 1.47     | 98.9 $\pm$ 1.37     | 98.93 $\pm$ 1.38    | 99.07 $\pm$ 1.26    |

**Supplementary Table 3.** The organ level errors for SSV, MSV and DL approaches in each fold. The reported values represent the mean  $\pm$  SD. For bladder, the values are not reported in fold 1, as the whole bladder was not included in the scan field-of-view for these patients.

|                     |        | <i>Error (%)</i>  |                    |                   | <i>Absolute percent error (%)</i> |                   |                   |
|---------------------|--------|-------------------|--------------------|-------------------|-----------------------------------|-------------------|-------------------|
|                     |        | <i>SSV</i>        | <i>MSV</i>         | <i>DL</i>         | <i>SSV</i>                        | <i>MSV</i>        | <i>DL</i>         |
| <i>Lesions</i>      | Fold 1 | 0.87 $\pm$ 3.92   | 0.05 $\pm$ 3.62    | 0.27 $\pm$ 3.64   | 1.8 $\pm$ 3.6                     | 1.4 $\pm$ 3.34    | 1.51 $\pm$ 3.32   |
|                     | Fold 2 | -0.09 $\pm$ 1.92  | -0.11 $\pm$ 1.75   | 0.05 $\pm$ 1.65   | 0.77 $\pm$ 1.75                   | 0.71 $\pm$ 1.6    | 0.71 $\pm$ 1.5    |
|                     | Fold 3 | -0.14 $\pm$ 3.44  | -0.07 $\pm$ 2.3    | -0.02 $\pm$ 2.03  | 1.54 $\pm$ 3.07                   | 1.14 $\pm$ 2      | 1.03 $\pm$ 1.75   |
|                     | Fold 4 | 0.21 $\pm$ 1.78   | 0.09 $\pm$ 1.61    | 0.07 $\pm$ 1.68   | 0.75 $\pm$ 1.63                   | 0.63 $\pm$ 1.5    | 0.66 $\pm$ 1.54   |
|                     | Fold 5 | -0.19 $\pm$ 4.35  | -0.46 $\pm$ 4.00   | -0.01 $\pm$ 3.76  | 2.03 $\pm$ 3.85                   | 1.74 $\pm$ 3.63   | 1.64 $\pm$ 3.38   |
| <i>Left Kidney</i>  | Fold 1 | 0.0087 $\pm$ 0.22 | -0.0058 $\pm$ 0.22 | 0.18 $\pm$ 0.27   | 0.13 $\pm$ 0.17                   | 0.12 $\pm$ 0.18   | 0.28 $\pm$ 0.15   |
|                     | Fold 2 | 0.12 $\pm$ 0.21   | 0.1 $\pm$ 0.21     | 0.28 $\pm$ 0.25   | 0.2 $\pm$ 0.14                    | 0.18 $\pm$ 0.13   | 0.3 $\pm$ 0.22    |
|                     | Fold 3 | 0.2 $\pm$ 0.12    | 0.19 $\pm$ 0.12    | 0.13 $\pm$ 0.09   | 0.2 $\pm$ 0.12                    | 0.19 $\pm$ 0.12   | 0.14 $\pm$ 0.07   |
|                     | Fold 4 | 0.1 $\pm$ 0.18    | 0.08 $\pm$ 0.18    | 0.15 $\pm$ 0.2    | 0.16 $\pm$ 0.11                   | 0.16 $\pm$ 0.11   | 0.21 $\pm$ 0.13   |
|                     | Fold 5 | 0.11 $\pm$ 0.12   | 0.09 $\pm$ 0.12    | 0.29 $\pm$ 0.15   | 0.16 $\pm$ 0.05                   | 0.14 $\pm$ 0.05   | 0.3 $\pm$ 0.11    |
| <i>Right Kidney</i> | Fold 1 | 0.12 $\pm$ 0.12   | 0.11 $\pm$ 0.12    | 0.29 $\pm$ 0.15   | 0.13 $\pm$ 0.1                    | 0.13 $\pm$ 0.1    | 0.29 $\pm$ 0.15   |
|                     | Fold 2 | 0.13 $\pm$ 0.12   | 0.1 $\pm$ 0.11     | 0.27 $\pm$ 0.16   | 0.15 $\pm$ 0.08                   | 0.13 $\pm$ 0.08   | 0.27 $\pm$ 0.16   |
|                     | Fold 3 | 0.22 $\pm$ 0.3    | 0.21 $\pm$ 0.3     | 0.17 $\pm$ 0.28   | 0.25 $\pm$ 0.28                   | 0.24 $\pm$ 0.27   | 0.2 $\pm$ 0.25    |
|                     | Fold 4 | -1.25 $\pm$ 4.29  | -0.82 $\pm$ 2.87   | -1 $\pm$ 3.64     | 1.49 $\pm$ 4.2                    | 1.03 $\pm$ 2.8    | 1.31 $\pm$ 3.53   |
|                     | Fold 5 | 0.18 $\pm$ 0.18   | 0.16 $\pm$ 0.17    | 0.35 $\pm$ 0.18   | 0.21 $\pm$ 0.14                   | 0.19 $\pm$ 0.13   | 0.35 $\pm$ 0.18   |
| <i>Liver</i>        | Fold 1 | 0.6 $\pm$ 0.43    | 0.54 $\pm$ 0.37    | 0.8 $\pm$ 0.4     | 0.6 $\pm$ 0.43                    | 0.54 $\pm$ 0.37   | 0.79 $\pm$ 0.4    |
|                     | Fold 2 | 1.58 $\pm$ 1.64   | 1.48 $\pm$ 1.51    | 0.84 $\pm$ 0.35   | 1.58 $\pm$ 1.64                   | 1.48 $\pm$ 1.51   | 0.84 $\pm$ 0.35   |
|                     | Fold 3 | 0.9 $\pm$ 0.8     | 0.85 $\pm$ 0.71    | 0.13 $\pm$ 0.33   | 0.92 $\pm$ 0.75                   | 0.85 $\pm$ 0.71   | 0.25 $\pm$ 0.25   |
|                     | Fold 4 | 0.6 $\pm$ 0.27    | 0.56 $\pm$ 0.25    | 0.4 $\pm$ 0.18    | 0.6 $\pm$ 0.27                    | 0.56 $\pm$ 0.25   | 0.4 $\pm$ 0.18    |
|                     | Fold 5 | 0.76 $\pm$ 0.64   | 0.71 $\pm$ 0.61    | 0.81 $\pm$ 0.36   | 0.76 $\pm$ 0.64                   | 0.71 $\pm$ 0.61   | 0.81 $\pm$ 0.36   |
| <i>Spleen</i>       | Fold 1 | 0.37 $\pm$ 0.96   | 0.35 $\pm$ 0.93    | 0.23 $\pm$ 0.38   | 0.51 $\pm$ 0.88                   | 0.5 $\pm$ 0.85    | 0.33 $\pm$ 0.28   |
|                     | Fold 2 | 1.85 $\pm$ 3.87   | 1.74 $\pm$ 3.68    | 0.23 $\pm$ 0.27   | 1.85 $\pm$ 3.87                   | 1.75 $\pm$ 3.68   | 0.27 $\pm$ 0.22   |
|                     | Fold 3 | 1.2 $\pm$ 1.52    | 1.13 $\pm$ 1.46    | -0.02 $\pm$ 0.09  | 1.2 $\pm$ 1.52                    | 1.13 $\pm$ 1.46   | 0.06 $\pm$ 0.07   |
|                     | Fold 4 | 1.35 $\pm$ 2.06   | 1.29 $\pm$ 2       | 0.01 $\pm$ 0.18   | 1.48 $\pm$ 1.96                   | 1.43 $\pm$ 1.9    | 0.14 $\pm$ 0.09   |
|                     | Fold 5 | 0.35 $\pm$ 0.65   | 0.32 $\pm$ 0.6     | 0.27 $\pm$ 0.2    | 0.4 $\pm$ 0.62                    | 0.37 $\pm$ 0.57   | 0.28 $\pm$ 0.18   |
| <i>Bones</i>        | Fold 1 | -19 $\pm$ 8.32    | -13.3 $\pm$ 5.93   | -6.38 $\pm$ 5.63  | 19 $\pm$ 8.32                     | 13.3 $\pm$ 5.9363 | 6.38 $\pm$ 5.63   |
|                     | Fold 2 | -18.16 $\pm$ 13.6 | -12.11 $\pm$ 9.33  | -8.32 $\pm$ 8.54  | 18.16 $\pm$ 13.6                  | 12.11 $\pm$ 9.33  | 8.32 $\pm$ 8.54   |
|                     | Fold 3 | -16.20 $\pm$ 8.51 | -10.37 $\pm$ 5.7   | -10.02 $\pm$ 5.36 | 16.2 $\pm$ 8.51                   | 10.37 $\pm$ 5.7   | 10.02 $\pm$ 5.36  |
|                     | Fold 4 | -16.54 $\pm$ 8.47 | -11 $\pm$ 5.71     | -9.62 $\pm$ 5.07  | 16.54 $\pm$ 8.47                  | 11 $\pm$ 5.71     | 9.62 $\pm$ 5.07   |
|                     | Fold 5 | -15.64 $\pm$ 8    | -10.78 $\pm$ 5.43  | -6.5 $\pm$ 4.38   | 15.64 $\pm$ 8                     | 10.78 $\pm$ 5.43  | 6.5 $\pm$ 4.38    |
| <i>Lungs</i>        | Fold 1 | 39.88 $\pm$ 32.76 | 4.3 $\pm$ 4.72     | 1.76 $\pm$ 3.97   | 39.88 $\pm$ 32.76                 | 4.3 $\pm$ 4.72    | 2.42 $\pm$ 3.56   |
|                     | Fold 2 | 44.8 $\pm$ 26     | 5.65 $\pm$ 5.3     | 1.75 $\pm$ 1.9    | 44.8 $\pm$ 26                     | 5.74 $\pm$ 5.2    | 2.14 $\pm$ 1.4    |
|                     | Fold 3 | 56.06 $\pm$ 52.63 | 5.54 $\pm$ 6.21    | 0.48 $\pm$ 3.77   | 56.06 $\pm$ 52.63                 | 5.54 $\pm$ 6.21   | 2.57 $\pm$ 2.67   |
|                     | Fold 4 | 40.9 $\pm$ 49.86  | 4.15 $\pm$ 8.71    | -1.35 $\pm$ 3.07  | 40.9 $\pm$ 49.86                  | 4.92 $\pm$ 8.25   | 2.35 $\pm$ 2.3    |
|                     | Fold 5 | 42.77 $\pm$ 32.86 | 3.19 $\pm$ 4.02    | -0.03 $\pm$ 4.16  | 42.77 $\pm$ 32.86                 | 3.64 $\pm$ 3.57   | 3.45 $\pm$ 2      |
| <i>Spinal Cord</i>  | Fold 1 | -8.17 $\pm$ 22.21 | -8.24 $\pm$ 22.11  | -7.98 $\pm$ 20.62 | 17.44 $\pm$ 14.9                  | 17.23 $\pm$ 15.07 | 11.84 $\pm$ 18.38 |
|                     | Fold 2 | 9.13 $\pm$ 14.81  | 9.53 $\pm$ 14.73   | -2.8 $\pm$ 9.36   | 9.13 $\pm$ 14.81                  | 9.53 $\pm$ 14.73  | 5.78 $\pm$ 7.7    |
|                     | Fold 3 | 2.77 $\pm$ 11.68  | 4.28 $\pm$ 8.55    | -9.85 $\pm$ 27.68 | 8.43 $\pm$ 8                      | 7.25 $\pm$ 5.84   | 11.72 $\pm$ 26.83 |

|                |        |              |               |              |              |              |             |
|----------------|--------|--------------|---------------|--------------|--------------|--------------|-------------|
|                | Fold 4 | 7.51 ± 12.33 | 7.7 ± 12.32   | -1.92 ± 6.27 | 9.31 ± 10.87 | 9.36 ± 10.95 | 3.44 ± 5.5  |
|                | Fold 5 | 2.64 ± 9.3   | 2.96 ± 9.14   | -1.74 ± 9.18 | 7.33 ± 5.87  | 7.35 ± 5.76  | 6.07 ± 6.83 |
| <b>Bladder</b> | Fold 1 | -            | -             | -            | -            | -            | -           |
|                | Fold 2 | 0.08 ± 0.11  | 0.07 ± 0.09   | 0.27 ± 0.18  | 0.08 ± 0.11  | 0.06 ± 0.09  | 0.27 ± 0.18 |
|                | Fold 3 | -0.63 ± 1.58 | -0.64 ± 1.58  | -1.34 ± 1.87 | 0.92 ± 1.4   | 0.92 ± 1.4   | 1.34 ± 1.87 |
|                | Fold 4 | -0.09 ± 0.3  | -0.09 ± 0.3   | -0.11 ± 0.33 | 0.22 ± 0.16  | 0.22 ± 0.16  | 0.24 ± 0.2  |
|                | Fold 5 | -6.16 ± 13.7 | -6.26 ± 13.63 | -1.15 ± 3.2  | 7.2 ± 13.01  | 7.11 ± 13.06 | 1.8 ± 2.76  |

**Supplementary Table 4.** Voxel- and lesion-wise errors for the evaluated approaches resulting in unfavorable results (RE: relative error, RAE: relative absolute error).

| <b>Model</b>                                 | <b>Inputs</b> | <b>fold</b> | <b>Voxel wise RE (%)</b> | <b>Voxel wise RAE (%)</b> | <b>Lesions Error (%)</b> | <b>Lesions Absolute Error (%)</b> |
|----------------------------------------------|---------------|-------------|--------------------------|---------------------------|--------------------------|-----------------------------------|
| Multiple variants<br>(best achieved results) | CT+TIA        | 0           | -14.59 ± 3.85            | 16.92 ± 3.72              | -10.45 ± 7.61            | 12.21 ± 4.16                      |
|                                              |               | 1           | -27.72 ± 4.91            | 28.54 ± 4.84              | -19.51 ± 4.68            | 19.51 ± 4.68                      |
|                                              |               | 2           | -6.42 ± 6.06             | 12.68 ± 3.51              | -6.20 ± 11.29            | 12.06 ± 4.40                      |
|                                              |               | 3           | -32.24 ± 24.18           | 32.93 ± 23.91             | -16.57 ± 17.92           | 17.31 ± 17.19                     |
|                                              |               | 4           | -23.17 ± 3.38            | 27.80 ± 10.78             | -11.06 ± 12.22           | 13.32 ± 9.68                      |
|                                              |               | Overall     | -20.96 ± 14.64           | 23.91 ± 14.07             | -12.40 ± 12.10           | 14.77 ± 9.05                      |
| Multiple variants<br>(best achieved results) | CT+MSV        | 0           | -3.24 ± 1.31             | 4.98 ± 1.13               | -4.35 ± 3.20             | 4.66 ± 2.72                       |
|                                              |               | 1           | -3.41 ± 1.10             | 5.00 ± 0.74               | -4.16 ± 2.17             | 4.47 ± 1.41                       |
|                                              |               | 2           | -2.88 ± 1.17             | 4.82 ± 0.91               | -0.78 ± 4.02             | 3.05 ± 2.72                       |
|                                              |               | 3           | -10.71 ± 1.27            | 11.43 ± 1.24              | -4.08 ± 2.83             | 4.69 ± 1.58                       |
|                                              |               | 4           | -10.34 ± 1.65            | 10.71 ± 1.70              | -3.99 ± 2.50             | 4.24 ± 2.04                       |
|                                              |               | Overall     | -6.18 ± 3.87             | 7.44 ± 3.26               | -3.31 ± 3.33             | 4.12 ± 2.25                       |

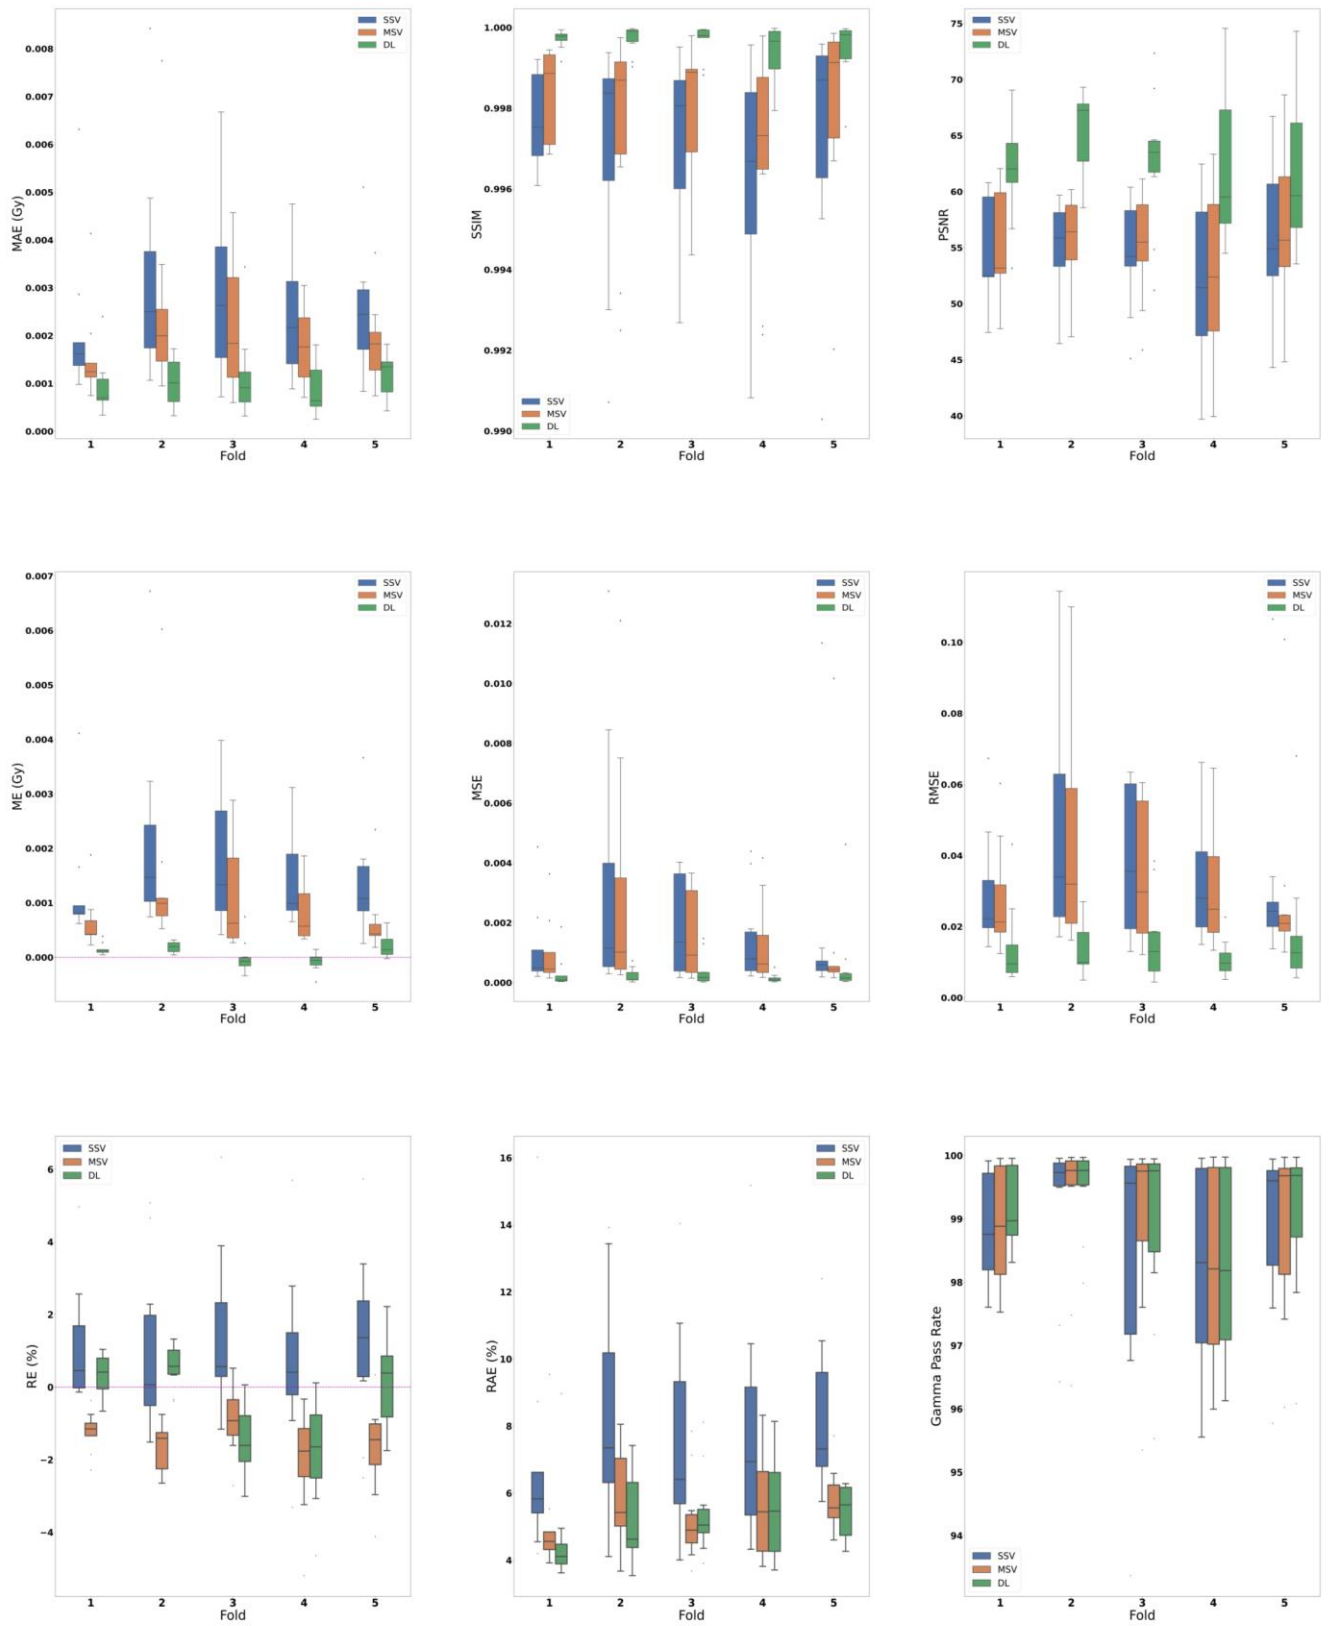

**Supplementary figure 1.** voxel-wise quantitative metrics of every fold for SSV, MSV, DL approaches.

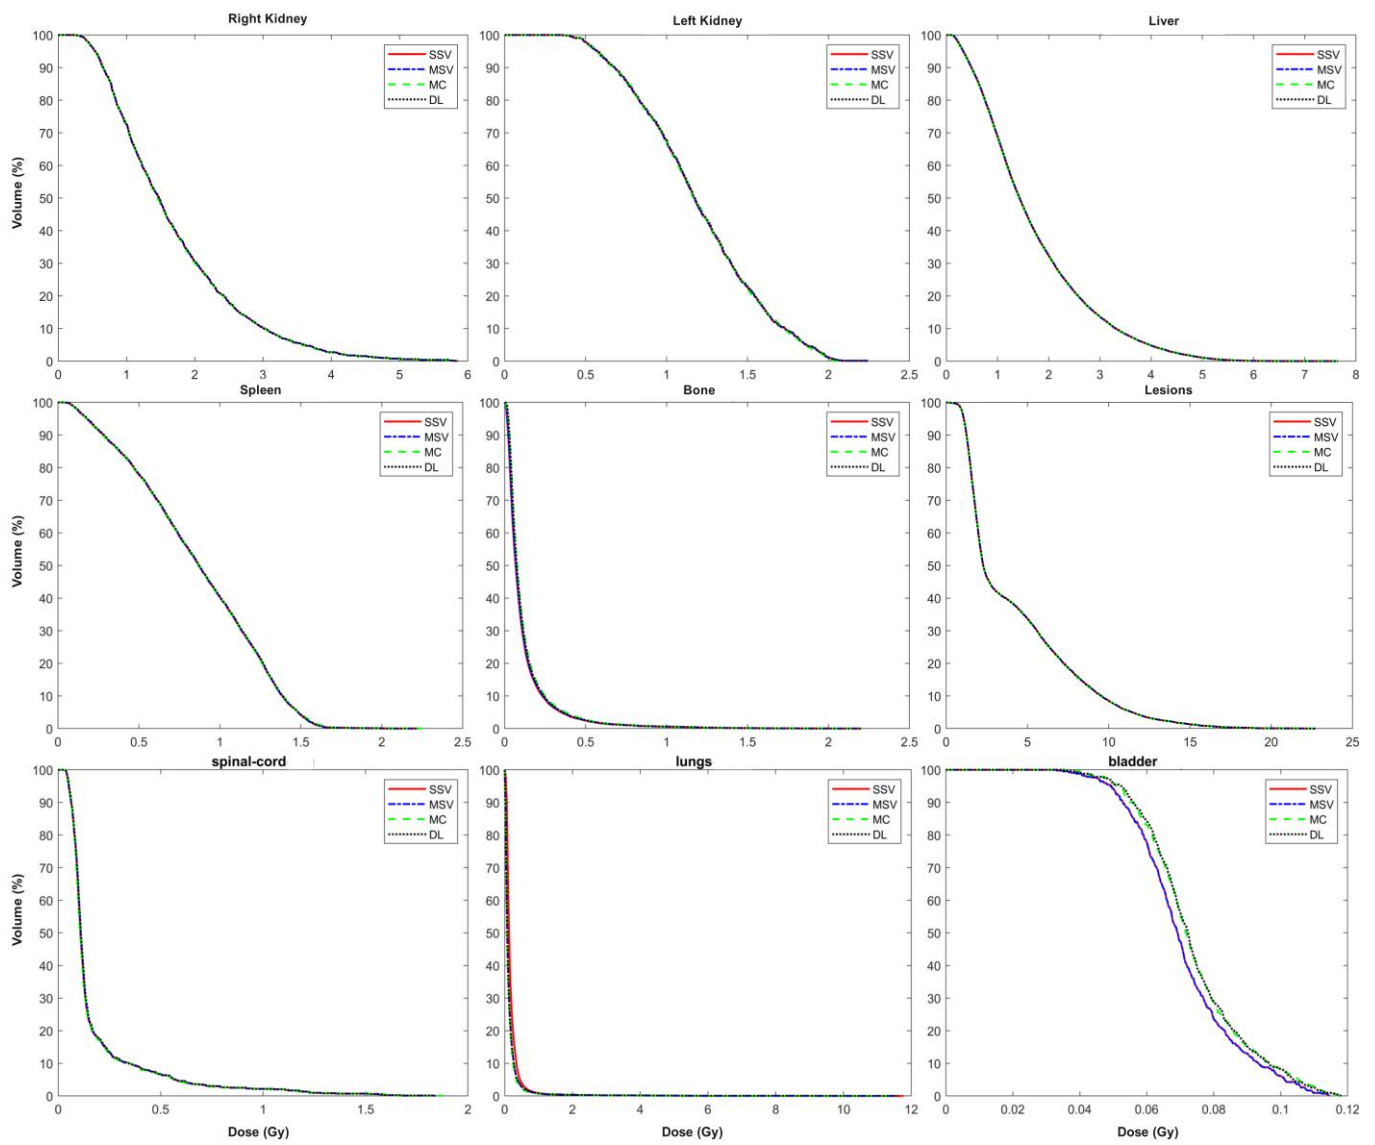

**Supplementary figure 2.** Representative organ-specific DVHs for all dosimetric approaches.
